# Supplementary material for: Extending Square Conservation to Arbitrarily Structured C-grids with Shallow Water Equations
Source: Copernicus journal article supplement (doi:10.5194/gmd-2019-122), 2019-06-21
Supplement: Supplementary file [file zeng-1987.pdf › References/zeng-1987.pdf]

# 球面上斜压原始方程组 保持总有效能量守恒的差分格式

曾庆存 张学洪

(中国科学院大气物理研究所)

## 提 要

本文从标准层结近似下球面上的斜压原始方程组出发,针对两类常用的网格系统——C-网格和B-网格,分别设计出可以保持总动能、总有效位能和总有效表面位能之和守恒的差分格式。同时,讨论了定义在交错网格上的差分和平算子的一些很有用的性质。

## 一、引 言

保持动力方程组的整体性质一直是数值天气预报和大气环流模式差分格式设计的一个基本原则。在绝热和无摩擦条件下,全球大气的总能量守恒,由于位能比动能大得多,而且总位能仅仅表征大气热力学状态的一阶矩,所以保持总能量守恒对数值计算来说未必是十分有效的约束。采用标准层结近似下的原始方程组,可以保证解的总动能、总有效位能和总有效表面位能之和守恒<sup>[1]</sup>。这三者量级相当,它们之和构成了一个平方守恒量,无论在物理上还是在数学上都有重要意义,可称为“总有效能量”。

总有效能量守恒是由反映能量的传播和转移的一系列能量关系式构成的。因此,构造保持总有效能量守恒的差分格式,关键和实质就是要在离散情形下保持这些能量关系式,从而使差分系统能正确描写大气中能量的传播和转移过程。从这个观点出发,设计保持总能量守恒的差分格式就不应当只是一种巧妙的拼凑,而应当是物理原则和数学方法的结合。

1965年,曾庆存<sup>[2,3]</sup>提出了差分算子的“积分律”和“共轭律”,把差分 and 微分、离散量求和和积分相比拟,可以更透彻地理解差分运算和保持它的整体性质。以后,又提出过几套适用于原始方程模式的差分格式<sup>[3]</sup>,并设计出了适用于非交错网格系统的可保持总能量完全守恒的差分格式<sup>[4]</sup>。七十年代以来,国际上开始流行变量呈交错分布的网格系统,其中最主要的是C-网格和B-网格<sup>[5]</sup>,因为它们对于重力惯性波的频散性质歪曲最小。对于交错网格来说,必须把动力方程组的某些局地性质转化为整体性质(例如C-网格中科氏力不作功的性质就是如此),这样,对平均算子整体性质的了解就显得特别重要。

本文讨论了交错网格上的差分和平算子的一些有用的性质,并据此在C-网格和B-网格上设计出了标准层结近似下球面斜压原始方程组保持总有效能量守恒的差分格

式, 其中  $C$ -网格上的格式已经过较严格检验, 证明可适用于长时期的数值模拟<sup>[6]</sup>.

## 二、标准层结近似下的原始方程组及能量关系式

在标准层结近似<sup>[1]</sup>下, 球面上  $(\theta, \lambda, \sigma, t)$  坐标下的原始方程组可写成:

$$\begin{cases} \frac{\partial V}{\partial t} = - \sum_{m=1}^3 \mathcal{L}_m(V) + f^*U - \mathcal{D}_\theta^{(1)} - \mathcal{D}_\theta^{(2)} \\ \frac{\partial U}{\partial t} = - \sum_{m=1}^3 \mathcal{L}_m(U) - f^*V - \mathcal{D}_\lambda^{(1)} - \mathcal{D}_\lambda^{(2)} \\ \frac{\partial \Phi}{\partial t} = - \sum_{m=1}^3 \mathcal{L}_m(\Phi) + \frac{(c_0 + \delta)}{P\sigma} (Q^{(1)} + Q_\theta^{(2)} + Q_\lambda^{(2)}) \\ \frac{\partial p_{es}}{\partial t} = - D_2(P) - \frac{\partial PW}{\partial \sigma}, P \equiv \sqrt{p_s} \\ \frac{\partial \phi'}{\partial \sigma} = - \frac{c_0 S}{P\sigma} \Phi, S \equiv \frac{\sigma p_{es}}{\sigma p_{es} + p_s} \end{cases} \quad (1)$$

其中

$$\begin{cases} \mathcal{L}_1(F) \equiv \frac{1}{2a \sin \theta} \left( 2 \frac{\partial F u}{\partial \lambda} - F \frac{\partial u}{\partial \lambda} \right) \\ \mathcal{L}_2(F) \equiv \frac{1}{2a \sin \theta} \left( 2 \frac{\partial F v \sin \theta}{\partial \theta} - F \frac{\partial v \sin \theta}{\partial \theta} \right) \\ \mathcal{L}_3(F) \equiv \frac{1}{2} \left( 2 \frac{\partial F \dot{\sigma}}{\partial \sigma} - F \frac{\partial \dot{\sigma}}{\partial \sigma} \right) \\ \mathcal{D}_\theta^{(1)} \equiv P \frac{\partial \phi'}{a \partial \theta} \quad \mathcal{D}_\lambda^{(1)} \equiv P \frac{\partial \phi'}{a \sin \theta \partial \lambda} \\ \mathcal{D}_\theta^{(2)} \equiv 2 \frac{c_0 S}{P} \Phi \frac{\partial P}{a \partial \theta} \quad \mathcal{D}_\lambda^{(2)} \equiv 2 \frac{c_0 S}{P} \Phi \frac{\partial P}{a \sin \theta \partial \lambda} \\ Q^{(1)} \equiv PW + \sigma \frac{\partial p_{es}}{\partial t} \\ Q_\theta^{(2)} \equiv 2\sigma V \frac{\partial P}{a \partial \theta} \quad Q_\lambda^{(2)} \equiv 2\sigma U \frac{\partial P}{a \sin \theta \partial \lambda} \end{cases} \quad (2)$$

所用记号的含义均见文献[6], 要特别指出的是,  $\Phi$  是与扰动温度有关的热力学变量;  $\phi'$  是扰动位势高度;  $U \equiv Pu$ ,  $V \equiv Pv$ ,  $W \equiv P\dot{\sigma}$ ,  $\Phi \equiv PRT'/c_0$ ,  $P \equiv \sqrt{p_s - p_s}$ ,  $c_0^2 = R^2 \tilde{T}(\gamma_s - \tilde{\gamma})/g$  为静力稳定度参数,  $\tilde{T}(z)$  为“标准大气”的温度, 但  $v$  分量北风为正、南风为负, 与通常的规定相反. 还有,  $c_0^2(1 + \delta/c_0) = R^2(\tilde{T} + T')(\gamma_s - \tilde{\gamma})/g_0$ .

垂直边界条件是:

$$W|_{\sigma=0,1} = 0 \quad (3)$$

由此可得总质量守恒

$$\frac{\partial}{\partial t} \int_0^{2\pi} \int_0^\pi p_{es} a^2 \sin \theta d\theta d\lambda = 0 \quad (4)$$

令

$$\begin{cases} c_k \equiv \frac{1}{2} (U^2 + V^2) \\ c_{sp} \equiv \frac{1}{2} \Phi^2 \\ c_{ss} \equiv \frac{R\tilde{T}_s}{\tilde{p}_s} \cdot \frac{1}{2} (p'_{ss})^2 \end{cases} \quad (5)$$

它们分别代表动能密度、有效位能密度和有效表面位能密度,其中  $p'_{ss} \equiv p_{ss} - (\tilde{p}_s - p_s)$ , 而  $\tilde{p}_s$  和  $\tilde{T}_s$  分别为标准大气的气压( $\tilde{p}$ )和温度( $\tilde{T}$ )在地表面上( $\sigma = 1$ )的值,其中  $\tilde{p}$  和  $\tilde{T}$  只是高度  $z$  的函数。

(1) 式的右端各项有下列性质:

$$\begin{aligned} 1. \quad & \begin{cases} \int_0^{2\pi} F \cdot \mathcal{L}_1(F) \cdot a \sin \theta d\lambda = 0 \\ \int_0^\pi F \cdot \mathcal{L}_2(F) \cdot a \sin \theta d\theta = 0 \\ \int_0^1 F \cdot \mathcal{L}_3(F) d\sigma = 0 \end{cases} \quad (F = U, V, \Phi) \end{aligned} \quad (6)$$

即水平平流和垂直输送项不改变总动能和总有效位能;

$$2. \quad V \cdot f^* U - U \cdot f^* V = 0 \quad (7)$$

即科氏力和曲率项不改变动能密度;

$$\begin{aligned} 3. \quad & \int_0^1 \int_0^{2\pi} \int_0^\pi \left[ (-U \cdot \mathcal{P}_i^{(1)} - V \cdot \mathcal{P}_\theta^{(1)}) + \Phi \cdot \frac{c_0 \delta}{P\sigma} \mathcal{Q}^{(1)} \right] a^2 \sin \theta d\theta d\lambda d\sigma \\ & = - \frac{\partial}{\partial t} \int_0^1 \int_0^{2\pi} \int_0^\pi c_{ss} \cdot a^2 \sin \theta d\theta d\lambda \end{aligned} \quad (8)$$

这里用到了关系式

$$\phi' \big|_{\sigma=1} = \frac{R\tilde{T}_s}{\tilde{p}_s} p'_{ss}$$

(见文献[11])。(8)式说明,位势高度梯度可以引起总动能的变化,  $\mathcal{Q}^{(1)}$  也可以引起总有效位能的变化,不过,由这两种作用造成的总动能和总有效位能之和的增加率(或减少率)总是等于总有效表面位能的减少率(或增加率);

$$4. \quad (-U \cdot \mathcal{P}_i^{(2)} - V \cdot \mathcal{P}_\theta^{(2)}) + \Phi \cdot \frac{c_0 \delta}{P\sigma} \mathcal{Q}^{(2)} = 0 \quad (9)$$

即地面气压梯度引起的动能密度的增加率(或减少率)总是等于  $\mathcal{Q}^{(2)}$  引起的有效位能密度的减少率(或增加率)。

(6)–(9)式就是和(1)及(3)式相应的能量关系式,其中(6)和(8)式只是整体性质,(7)和(9)式是局地性质(当然也是整体性质),它们一起保证了总有效能量守恒(若令  $\delta = 0$ ),即

$$\frac{\partial}{\partial t} \int_0^1 \int_0^{2\pi} \int_0^\pi \left[ \int_0^1 (c_k + c_{sp}) d\sigma + c_{ss} \right] a^2 \sin \theta d\theta d\lambda = 0 \quad (10)$$

因此,为了构造保持总有效能量守恒的差分格式,应当特别注意(6)–(9)所表明的能量转换关系,务使它们在离散系统中仍能以某种方式得以保持。

### 三、差分和平均算子以及它们的性质

本节将对分布在交错格点上的离散变量定义一些差分 and 平均算子, 并考察它们的某些同微分和积分运算相类似的性质, 为构造方程组(1)的保持总有效能量的差分格式作准备.

设  $F(r)$  和  $G(r)$  是定义在  $a \leq r \leq b$  上的可微函数,  $L$  为一正整数,

$$\Delta r = \frac{b-a}{L},$$

则

$$F_l \equiv F(r_l), r_l = l\Delta r, l = 0, 1, 2, \dots, L$$

和

$$G_{l+\frac{1}{2}} \equiv G(r_{l+\frac{1}{2}}), r_{l+\frac{1}{2}} = \left(l + \frac{1}{2}\right)\Delta r, l = 0, 1, 2, \dots, L-1$$

构成两组离散变量, 它们定义在交错分布的两套等距格点上, 于是我们有:

**定义 1** (半点上的差分和平均算子):

$$\begin{aligned} (F_r)_{l+\frac{1}{2}} &\equiv F_{l+1} - F_l \\ (\bar{F}')_{l+\frac{1}{2}} &\equiv \frac{1}{2}(F_{l+1} + F_l) \end{aligned} \quad l = 0, 1, 2, \dots, L-1$$

**定义 2** (整点上的差分和平均算子):

$$\begin{aligned} (\delta_r G)_l &\equiv G_{l+\frac{1}{2}} - G_{l-\frac{1}{2}} \\ (\tilde{G}')_l &\equiv \frac{1}{2}(G_{l+\frac{1}{2}} + G_{l-\frac{1}{2}}) \end{aligned} \quad l = 1, 2, \dots, L-1$$

容易证明它们具有如下性质:

**性质 1:**

$$\begin{aligned} (F\tilde{G}')_r &\equiv GF_r + \overline{F\delta_r G} \\ \delta_r(\bar{F}'G) &\equiv \widetilde{GF'_r} + F\delta_r G \end{aligned}$$

**性质 2:**

设  $A, B$  分别是  $F$  型和  $G$  型离散变量, 则有:

$$\begin{aligned} (FA)_r &\equiv \bar{A}'F_r + \bar{F}'A_r \\ \delta_r(GB) &\equiv \tilde{B}'\delta_r G + \tilde{G}'\delta_r B \end{aligned}$$

性质 1 和性质 2 可看作微分运算法则

$$d(fg) = gdf + fdg$$

在离散变量情形的表现形式.

**性质 3:**

引进两种形式上的几何平均  $\hat{F}$  和  $\hat{G}$ :

$$\begin{aligned} (\hat{F}^2)_{l+\frac{1}{2}} &\equiv F_{l+1} \cdot F_l \quad l = 0, 1, 2, \dots, L-1 \\ (\hat{G}^2)_l &\equiv G_{l+\frac{1}{2}} \cdot G_{l-\frac{1}{2}} \quad l = 1, 2, \dots, L-1 \end{aligned}$$

则有

$$F^2 \delta_r G + 2 \widetilde{F G F_r} = \delta_r (G \hat{F}^2)$$

$$G^2 F_r + 2 \overline{G F \delta_r G} = (F \check{G}^2)_r$$

这性质和能量运算中经常用到的微分关系式

$$f dg + g \cdot 2f df = d(gf^2)$$

是类似的.

**性质 4:**

$$\sum_{l=0}^{L-1} (F_r)_{l+\frac{1}{2}} = F_L - F_0$$

$$\sum_{l=1}^{L-1} (\delta_r G)_l = G_{L-\frac{1}{2}} - G_{\frac{1}{2}}$$

**性质 5:**

$$\sum_{l=0}^{L-1} (G F_r)_{l+\frac{1}{2}} = - \sum_{l=1}^{L-1} (F \delta_r G)_l + (F_L G_{L-\frac{1}{2}} - F_0 G_{\frac{1}{2}})$$

性质 5 和性质 6 是定积分和原函数的关系在离散变量情形下的表现形式.

**性质 6:**

$$\sum_{l=0}^{L-1} (G \bar{F}^r)_{l+\frac{1}{2}} = \sum_{l=1}^{L-1} (F \check{G}^r)_l + \frac{1}{2} (F_L G_{L-\frac{1}{2}} + F_0 G_{\frac{1}{2}})$$

性质 6 表明, 对求和运算而言, 两种平均算子可以相互转换. 以下将它推广到二维情形.

设  $F(r, s)$  和  $G(r, s)$  是定义在  $(a \leq r \leq b, c \leq s \leq d)$  上的二元函数,  $M$  和  $L$  是正整数,

$$\Delta r = \frac{b-a}{L}, \quad \Delta s = \frac{d-c}{M},$$

于是

$$F_{l,m} \equiv F(r_l, s_m) \quad r_l = l \Delta r \quad s_m = m \Delta s$$

$$l = 0, 1, 2, \dots, L \quad m = 0, 1, 2, \dots, M$$

和

$$G_{l+\frac{1}{2}, m+\frac{1}{2}} \equiv G(r_{l+\frac{1}{2}}, s_{m+\frac{1}{2}}) \quad r_{l+\frac{1}{2}} = \left(l + \frac{1}{2}\right) \Delta r \quad s_{m+\frac{1}{2}} = \left(m + \frac{1}{2}\right) \Delta s$$

$$l = 0, 1, 2, \dots, L-1 \quad m = 0, 1, 2, \dots, M-1$$

构成两组交错分布的二维离散变量, 利用一维离散变量平均算子的定义可给出

**定义 3** (二维平均算子):

$$(\bar{F}^r)_{l+\frac{1}{2}, m+\frac{1}{2}} \equiv \frac{1}{2} [(\bar{F}^r)_{l+\frac{1}{2}, m+1} + (\bar{F}^r)_{l+\frac{1}{2}, m}]$$

$$l = 0, 1, 2, \dots, L-1 \quad m = 0, 1, 2, \dots, M-1$$

$$(\tilde{G}')_{l,m} \equiv \frac{1}{2} [(\tilde{G}')_{l,m+\frac{1}{2}} + (\tilde{G}')_{l,m-\frac{1}{2}}]$$

$$l = 1, 2, \dots, L-1 \quad m = 1, 2, \dots, M-1$$

假定  $F$  和  $G$  对于  $r$  来说都是以  $b-a$  为周期的函数, 则可用周期延拓的方法定义

$$F_{L+1,m} \equiv F_{1,m} \quad G_{L+\frac{1}{2},m+\frac{1}{2}} \equiv G_{\frac{1}{2},m+\frac{1}{2}} \quad (*)$$

此时我们有:

性质 7:

$$\begin{aligned} \sum_{l=1}^L \sum_{m=0}^{M-1} (\bar{F}'^i G)_{l+\frac{1}{2},m+\frac{1}{2}} &= \sum_{l=1}^L \sum_{m=1}^{M-1} (F \tilde{G}'^i)_{l,m} \\ &+ \frac{1}{2} \sum_{l=1}^L [F_{l,M} (\tilde{G}')_{l,M-\frac{1}{2}} + F_{l,0} (\tilde{G}')_{l,\frac{1}{2}}] \end{aligned}$$

这性质在构造球面交错网格上的差分格式时非常有用。下面给出一个证明:

对任意固定的  $m$ , 由性质 6 可得:

$$\begin{aligned} \sum_{l=1}^L (\bar{F}'^i G)_{l+\frac{1}{2},m+\frac{1}{2}} &= \sum_{l=2}^L (\bar{F}' \tilde{G}')_{l,m+\frac{1}{2}} \\ &+ \frac{1}{2} (\bar{F}'_{L+1,m+\frac{1}{2}} \cdot G_{L+\frac{1}{2},m+\frac{1}{2}} + \bar{F}'_{1,m+\frac{1}{2}} \cdot G_{\frac{1}{2},m+\frac{1}{2}}) \\ &= \sum_{l=1}^L (\bar{F}' \tilde{G}')_{l,m+\frac{1}{2}}, \end{aligned}$$

此处用到(\*)式;

对任意固定的  $l$ , 由性质 6 又可得:

$$\sum_{m=0}^{M-1} (\bar{F}' \tilde{G}')_{l,m+\frac{1}{2}} = \sum_{m=1}^{M-1} (F \tilde{G}'^i)_{l,m} + \frac{1}{2} [F_{l,M} \cdot (\tilde{G}')_{l,M-\frac{1}{2}} + F_{l,0} \cdot (\tilde{G}')_{l,\frac{1}{2}}]$$

将此式对  $l$  求和  $\left(\sum_{l=1}^L\right)$  即知性质 7 得证。

#### 四、球面网格系统

为了用差分方法求解方程组(1), 首先要确定一套球面上的三维网格系统和变量在格点上的分布方式。

在垂直方向( $0 \leq \sigma \leq 1$ )取  $K$  层, 层距  $\Delta\sigma = \frac{1}{K}$ , 主要预报量  $U, V, \Phi$  写在各层中央, 诊断量  $\phi'$  和  $W$  写在两层之间的界面上(见图 1)

离散变量的垂直边界条件是:

$$W|_{k=\frac{1}{2}} = W|_{k=K+\frac{1}{2}} = 0$$

及

$$\phi'|_{k=K+\frac{1}{2}} = \frac{R\tilde{T}_r}{\tilde{p}_r} (p_r - \tilde{p}_r) \quad (12)$$

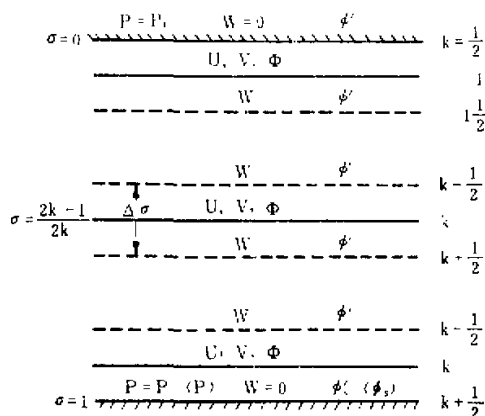

图1 垂直分层及变量的垂直分布

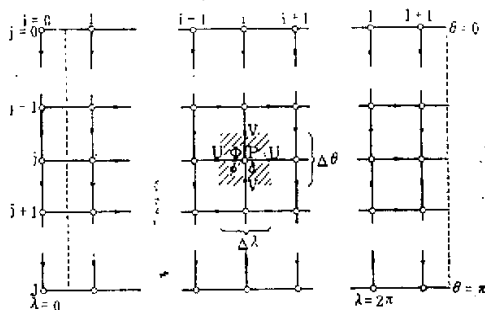

图2 C-网格上变量的分布

在水平方向 ( $0 \leq \theta \leq \pi, 0 \leq \lambda \leq 2\pi$ ) 采用余纬-经度网格, 取

$$\Delta\theta = \frac{\pi}{J}, \quad \Delta\lambda = \frac{2\pi}{I},$$

其中  $J$  和  $I$  是正整数,  $j=0$  和  $j=J$  分别为北极和南极, 变量在水平网格点上呈交错分布, 这里采用了两种方式, 即  $C$ -网格和  $B$ -网格<sup>[5]</sup> (分别见图2和图3)。在描写重力-惯性波的频散性质方面,  $B$ -网格优于  $C$ -网格, 但在  $C$ -网格上计算散度、涡度和平流项的格式特别简单, 计算量较小, 我们的试验<sup>[6]</sup>表明它也是可用的。

在  $C$ -网格上必须确定  $U$  在  $j=0, J$  处的“边界”条件, 由极点涡度有限及  $U$  的连续性我们取

$$U|_{j=0, J} = 0 \quad (13)$$

两套网格上的变量在  $\lambda$  方向均应满足周期条件, 为计算方便起见再延拓出一列格点, 即有

$$\begin{cases} F|_{i=J} = F|_{i=0} & F|_{i=J+1} = F|_{i=1} \\ G|_{i'=J+\frac{1}{2}} = G|_{i'=\frac{1}{2}} & G|_{i'=J+\frac{3}{2}} = G|_{i'=\frac{3}{2}} \end{cases} \quad (14)$$

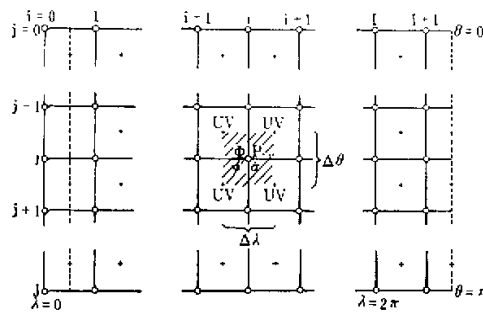

图 3 B-网格上变量的分布

此处  $F$  代表在  $\lambda$  方向的整数格点上取值的变量,  $G$  代表在半整数格点上取值的变量。

## 五、C-网格上的有效能量守恒格式

C-网格上的格式首先由曾庆存设计出, 1982 年在 GFDL 的学术讨论会上宣读过<sup>[7]</sup>, 其后又推广到海气耦合模式中去<sup>[8]</sup>, 并在国内大气环流和气候模拟试验中得到具体实现<sup>[6]</sup>。考虑到已有文献<sup>[6,8]</sup>都只有简短的叙述, 本文再用统一的符号加以推导。

利用第三节中定义的差分和平算子来构造方程组 (1) 在 C-网格上的空间差分格式, 要求它们保持总质量守恒以及能量关系式 (6)–(9), 从而保持总有效能量守恒。为书写简单记, 所有的离散变量仍使用原连续变量的记号; 下标  $i$  的变化范围为 1 至  $I$  或 0 至  $I-1$ , 下标  $k$  的变化范围为 1 至  $K$ 。

### 1. $D_2(P)$ 和连续性方程

$$\begin{cases} [D_2(P)]_{i,j,k} = \frac{1}{a \sin \theta_j} \left[ \frac{1}{\Delta \lambda} \delta_\lambda (\bar{P}^1 U) + \frac{1}{\Delta \theta} \delta_\theta (\bar{P}^0 V \sin \theta) \right]_{i,j,k} \\ j = 1, 2, \dots, J-1 \\ [D_2(P)]_{i=0} = \frac{4}{I a \Delta \theta} \sum_{i=1}^I (\bar{P}^0 V)_{i, \frac{1}{2}, k} \\ [D_2(P)]_{i=I} = -\frac{4}{I a \Delta \theta} \sum_{i=1}^I (\bar{P}^0 V)_{i, I-\frac{1}{2}, k} \end{cases} \quad (15)$$

相应地有

$$\left[ \frac{\partial p_{ex}}{\partial t} \right]_{i,j} = - \left[ D_2(P) + \frac{1}{\Delta \sigma} \delta_\sigma (PW) \right]_{i,j,k} \quad (16)$$

利用性质 4 和边界条件 (11)、(14) 易证

$$\frac{\partial}{\partial t} \sum_{i=1}^I \sum_{j=0}^J [p_{ex}]_{i,j} \cdot a^2 \varepsilon_j \Delta \theta \Delta \lambda = 0 \quad (17)$$



其中

$$\varepsilon_j \equiv \begin{cases} \sin \theta_j & \text{当 } j = 1, 2, \dots, J-1 \\ \frac{1}{4} \sin \theta_{\frac{1}{2}} \text{ 或 } \frac{1}{4} \sin \theta_{J-\frac{1}{2}} & \text{当 } j = 0 \text{ 或 } J \end{cases} \quad (18)$$

## 2. $\mathcal{L}_m(F)$ ( $F = U, V, \Phi; m = 1, 2, 3$ )

$$\begin{cases} [\mathcal{L}_1(U)]_{i+\frac{1}{2},j,k} = \frac{1}{2a \sin \theta_j \cdot \Delta \lambda} [2(\tilde{u}^1 \tilde{U}^1)_1 - U(\tilde{u}^1)_1]_{i+\frac{1}{2},j,k} \\ [\mathcal{L}_2(U)]_{i+\frac{1}{2},j,k} = \frac{1}{2a \sin \theta_j \cdot \Delta \theta} [2\delta_\theta(\tilde{v}^1 \sin \theta) \tilde{U}^\theta - U\delta_\theta(\tilde{v}^1 \sin \theta)]_{i+\frac{1}{2},j,k} \\ [\mathcal{L}_3(U)]_{i+\frac{1}{2},j,k} = \frac{1}{2\Delta \sigma} [2\delta_\sigma(\tilde{\sigma}^1 \tilde{U}^\sigma) - U\delta_\sigma(\tilde{\sigma}^1)]_{i+\frac{1}{2},j,k} \\ j = 1, 2, \dots, J-1 \end{cases} \quad (19)$$

$$\begin{cases} [\mathcal{L}_1(V)]_{i,j+\frac{1}{2},k} = \frac{1}{2a \sin \theta_{j+\frac{1}{2}} \cdot \Delta \lambda} [2\delta_\lambda(\tilde{u}^\theta \tilde{V}^1) - V\delta_\lambda(\tilde{u}^\theta)]_{i,j+\frac{1}{2},k} \\ [\mathcal{L}_2(V)]_{i,j+\frac{1}{2},k} = \frac{1}{2a \sin \theta_{j+\frac{1}{2}} \cdot \Delta \theta} [2(\nu \sin \theta \tilde{V}^\theta)_\theta - \nu(\sin \theta)_\theta]_{i,j+\frac{1}{2},k} \\ [\mathcal{L}_3(V)]_{i,j+\frac{1}{2},k} = \frac{1}{2\Delta \sigma} [2\delta_\sigma(\tilde{\sigma}^\theta \tilde{V}^\sigma) - V\delta_\sigma(\tilde{\sigma}^\theta)]_{i,j+\frac{1}{2},k} \\ j = 0, 1, 2, \dots, J-1 \end{cases} \quad (20)$$

$$\begin{cases} [\mathcal{L}_1(\Phi)]_{i,j,k} = \frac{1}{2a \sin \theta_j \cdot \Delta \lambda} [2\delta_\lambda(u \Phi^1) - \Phi \delta_\lambda u]_{i,j,k} \quad j = 1, 2, \dots, J-1 \\ [\mathcal{L}_2(\Phi)]_{i,j,k} = \frac{1}{2a \sin \theta_j \cdot \Delta \theta} [2\delta_\theta(v \sin \theta \Phi^\theta) - \Phi \delta_\theta(v \sin \theta)]_{i,j,k} \\ j = 1, 2, \dots, J-1 \\ [\mathcal{L}_2(\Phi)]_{i=0} = \frac{2}{Ia \Delta \theta} \sum_{i=1}^I [v_{i,\frac{1}{2},k} \cdot \Phi_{i+1,k}] \\ [\mathcal{L}_2(\Phi)]_{i=J} = -\frac{2}{Ia \Delta \theta} \sum_{i=1}^I [v_{i,J-\frac{1}{2},k} \cdot \Phi_{i,J-1,k}] \\ [\mathcal{L}_3(\Phi)]_{i,j,k} = \frac{1}{2\Delta \sigma} [2\delta_\sigma(\sigma \Phi^\sigma) - \Phi \delta_\sigma \sigma]_{i,j,k} \quad j = 0, 1, \dots, J \end{cases} \quad (21)$$

利用性质1、性质3及边界条件可证

$$\begin{cases} \sum_i [F \cdot \mathcal{L}_1(F) \cdot \varepsilon]_{i'} \cdot a \Delta \lambda = 0 \\ \sum_i [F \cdot \mathcal{L}_2(F) \cdot \varepsilon]_{i'} \cdot a \Delta \theta = 0 \\ \sum_k [F \cdot \mathcal{L}_3(F)]_k \cdot \Delta \sigma = 0 \end{cases} \quad F = U, V, \Phi \quad (22)$$

其中  $i' = i$  或  $i + \frac{1}{2}$ ,  $j' = j$  或  $j + \frac{1}{2}$ ,  $\varepsilon_{j+\frac{1}{2}} = \sin \theta_{j+\frac{1}{2}}$  ( $j = 0, 1, \dots, J-1$ ).

3.  $f^*V$  和  $f^*U$ 

$$\begin{cases} [f^*V]_{i+\frac{1}{2},j,k} = \frac{1}{\sin\theta_j} [f^*\widetilde{V^\lambda \sin\theta}]_{i+\frac{1}{2},j,k} & j=1,2,\dots,J-1 \\ [f^*V]_{i=0,j} = 0 \\ [f^*U]_{i,j+\frac{1}{2},k} = [\widetilde{f^*U^\lambda}]_{i,j+\frac{1}{2},k} & j=0,1,\dots,J-1 \end{cases} \quad (23)$$

其中

$$f^* \equiv 2\omega \cos\theta + \frac{c_{\text{tg}}\theta}{a} u_*$$

利用性质 7 可以证明

$$\begin{aligned} & \sum_{i=1}^I \sum_{j=0}^{J-1} [V \cdot (f^*U)]_{i,j+\frac{1}{2},k} \cdot a^2 \varepsilon_{j+\frac{1}{2}} \Delta\theta \Delta\lambda \\ & - \sum_{i=1}^I \sum_{j=0}^J [U \cdot (f^*V)]_{i+\frac{1}{2},j,k} \cdot a^2 \varepsilon_j \Delta\theta \Delta\lambda = 0 \end{aligned} \quad (24)$$

这里使用了和  $\bar{F}'_1$ 、 $\tilde{G}'_1$  相类似的二维平均算子  $\bar{F}_1^\theta$  和  $\bar{F}_2^\theta$ ，其中  $F_1$  是  $U$ -型离散变量， $F_2$  是  $V$ -型离散变量。

4.  $\mathcal{D}_1^{(v)}$ 、 $\mathcal{D}_\theta^{(v)}$  和  $\frac{c_0 S}{P\sigma} Q^{(v)}$  以及静力方程

$$\begin{cases} [\mathcal{D}_1^{(v)}]_{i+\frac{1}{2},j,k} = \frac{1}{a \sin\theta_j \cdot \Delta\lambda} [\bar{P}^\lambda(\tilde{\phi}'^\sigma)_\lambda]_{i+\frac{1}{2},j,k} & j=1,2,\dots,J-1 \\ [\mathcal{D}_\theta^{(v)}]_{i,j+\frac{1}{2},k} = \frac{1}{a \Delta\theta} [\bar{P}^\theta(\tilde{\phi}'^\sigma)_\theta]_{i,j+\frac{1}{2},k} & j=0,1,\dots,J-1 \end{cases} \quad (25)$$

$$\left[ \frac{c_0 S}{P\sigma} Q^{(v)} \right]_{i,j,k} = \left[ \frac{c_0 S}{P\sigma} \cdot \left( P \tilde{W}^\sigma + \sigma \frac{\partial p_\sigma}{\partial t} \right) \right]_{i,j,k} \quad j=0,1,\dots,J-1, J \quad (26)$$

静力方程差分形式为

$$\frac{1}{\Delta\sigma} [\delta_\sigma \phi']_{i,j,k} = - \frac{c_0 \cdot S_{i,j,k}}{\sigma_k \cdot P_{i,j}} \cdot \Phi_{i,j,k} \quad j=0,1,\dots,J \quad (27)$$

注意到恒等式  $\frac{1}{\sigma} = \frac{d \ln \sigma}{d \sigma}$ ，也可将(26)和(27)式中出现的  $\frac{1}{\sigma_k}$  换成  $\frac{1}{\Delta\sigma} [\delta_\sigma \ln \sigma]_k$ 。不管哪种取法，利用性质 2、性质 4、(15)、(16)、(27)、(12)诸式以及边界条件皆可证明：

$$\begin{aligned} & - \sum_{k=1}^K \left\{ \sum_{i=1}^I \sum_{j=1}^{J-1} [U \cdot \mathcal{D}_1^{(v)}]_{i+\frac{1}{2},j,k} \cdot a^2 \varepsilon_j \Delta\theta \Delta\lambda \right. \\ & + \sum_{i=1}^I \sum_{j=0}^{J-1} [V \cdot \mathcal{D}_\theta^{(v)}]_{i,j+\frac{1}{2},k} \cdot a^2 \varepsilon_{j+\frac{1}{2}} \Delta\theta \Delta\lambda \\ & \left. - \sum_{i=1}^I \sum_{j=0}^J \left[ \Phi \cdot \frac{c_0 S}{P\sigma} Q^{(v)} \right]_{i,j,k} \cdot a^2 \varepsilon_j \Delta\theta \Delta\lambda \right\} \cdot \Delta\sigma \end{aligned}$$

$$= -\frac{\partial}{\partial t} \sum_{i=1}^I \sum_{j=0}^J \left[ \frac{R\tilde{T}_i}{\tilde{p}_i} \cdot \frac{1}{2} (p'_{ei})^2 \right]_{i,j} \cdot a^2 \varepsilon_j \Delta \theta \Delta \lambda \quad (28)$$

5.  $\mathcal{D}_\lambda^{(2)}$ ,  $\mathcal{D}_\theta^{(2)}$  和  $\mathcal{Q}_\lambda^{(2)}$ ,  $\mathcal{Q}_\theta^{(2)}$

$$\begin{cases} [\mathcal{D}_\lambda^{(2)}]_{i+\frac{1}{2},j,k} = 2c_0 \cdot \frac{1}{a \sin \theta_j \cdot \Delta \lambda} \left[ \left( \frac{S\Phi}{P} \right)^\lambda \cdot P_\lambda \right]_{i+\frac{1}{2},j,k} & j=1,2,\dots,J-1 \\ [\mathcal{D}_\theta^{(2)}]_{i,j+\frac{1}{2},k} = 2c_0 \cdot \frac{1}{a \Delta \theta} \left[ \left( \frac{S\Phi}{P} \right)^\theta \cdot P_\theta \right]_{i,j+\frac{1}{2},k} & j=0,1,\dots,J-1 \end{cases} \quad (29)$$

$$\begin{cases} \left[ \frac{c_0 S}{P \sigma} \mathcal{Q}_\lambda^{(2)} \right]_{i,j,k} = 2c_0 \cdot \frac{1}{a \sin \theta_j \cdot \Delta \lambda} \left[ \frac{S}{P} \cdot \widetilde{U \cdot P_\lambda} \right]_{i,j,k} & j=1,2,\dots,J-1 \\ \left[ \frac{c_0 S}{P \sigma} \mathcal{Q}_\theta^{(2)} \right]_{i,j,k} = 2c_0 \cdot \frac{1}{a \sin \theta_j \cdot \Delta \theta} \left[ \frac{S}{P} \cdot \widetilde{V \sin \theta \cdot P_\theta} \right]_{i,j,k} & j=1,2,\dots,J-1 \end{cases} \quad (30)$$

$$\begin{aligned} \left[ \frac{c_0 S}{P \sigma} \mathcal{Q}_\theta^{(2)} \right]_{i=0} &= \frac{4c_0}{I a \Delta \theta} \left( \frac{S}{P} \right)_{i=0} \cdot \sum_{j=1}^I [V \cdot P_\theta]_{i,\frac{1}{2},k} \\ \left[ \frac{c_0 S}{P \sigma} \mathcal{Q}_\theta^{(2)} \right]_{i=J} &= \frac{4c_0}{I a \Delta \theta} \left( \frac{S}{P} \right)_{i=J} \cdot \sum_{j=1}^I [V \cdot P_\theta]_{i,J-\frac{1}{2},k} \end{aligned}$$

利用性质 6 及边界条件可以证明:

$$\begin{aligned} & - \sum_{i=1}^I [U \cdot \mathcal{D}_\lambda^{(2)}]_{i+\frac{1}{2},j,k} \cdot a \varepsilon_j \Delta \lambda \\ & + \sum_{i=1}^I [\Phi \cdot \frac{c_0 S}{P \sigma} \mathcal{Q}_\lambda^{(2)}]_{i,j,k} \cdot a \varepsilon_j \Delta \lambda = 0 \end{aligned} \quad (31)_1$$

和

$$\begin{aligned} & - \sum_{j=0}^{J-1} [V \cdot \mathcal{D}_\theta^{(2)}]_{i,j+\frac{1}{2},k} \cdot a \varepsilon_{j+\frac{1}{2}} \Delta \theta \\ & + \sum_{j=0}^J \left[ \Phi \cdot \frac{c_0 S}{P \sigma} \mathcal{Q}_\theta^{(2)} \right]_{i,j,k} \cdot a \varepsilon_j \Delta \theta = 0 \end{aligned} \quad (31)_2$$

至此,我们已经给出了方程组(1)在  $C$ -网格上的空间差分格式。注意到(17)式即是总质量守恒方程(4)的离散形式,而(22)、(24)、(28)和(31)式则分别是能量关系式(6)、(7)、(8)和(9)的离散形式,即可得到和(10)式对应的离散形式的总有效能量守恒方程:

$$\begin{aligned} & \frac{\partial}{\partial t} \left\{ \sum_{k=1}^K \left( \sum_{i=1}^I \sum_{j=1}^{J-1} \frac{1}{2} [U^2]_{i+\frac{1}{2},j,k} \cdot a^2 \varepsilon_j \Delta \theta \Delta \lambda \right. \right. \\ & \quad + \sum_{i=1}^I \sum_{j=0}^{J-1} \frac{1}{2} [V^2]_{i,j+\frac{1}{2},k} \cdot a^2 \varepsilon_{j+\frac{1}{2}} \Delta \theta \Delta \lambda \\ & \quad \left. \left. + \sum_{i=1}^I \sum_{j=0}^J \frac{1}{2} [\Phi^2]_{i,j,k} \cdot a^2 \varepsilon_j \Delta \theta \Delta \lambda \right) \right\} \cdot \Delta \sigma \end{aligned}$$

$$+ \sum_{i=1}^I \sum_{j=0}^J \left[ \frac{R \tilde{T}_i}{\bar{p}_i} \cdot \frac{1}{2} (\bar{p}'_{ii})^2 \right]_{i,j} \cdot a^2 \mathbf{e}_j \Delta \theta \Delta \lambda \} = 0 \quad (32)$$

这里用到关系式

$$F \cdot \frac{\partial F}{\partial t} = \frac{\partial}{\partial t} \left( \frac{1}{2} F^2 \right).$$

当使用全隐式差分格式时,类似的离散关系式成立,因此,对球面上的斜压原始方程组也可以得到完全保持总有效能量守恒的时-空差分格式。

顺便指出,由于变量在  $C$ -网格中呈交错分布,和(7)、(9)式相应的离散关系式(24)、(31)不再是局地的,只能在整体上保持原有的性质。不过这对于我们的目的来说已经足够了。

## 六、 $B$ -网格上的能量守恒格式

张学洪设计出方程组(1)在  $B$ -网格上保持总有效能量守恒的差分格式。

### 1. $D_2(P)$ 和连续性方程

$$\begin{cases} [D_2(P)]_{i,j,k} = -\frac{1}{a \sin \theta_j} \left[ \frac{1}{\Delta \lambda} \partial_\lambda (\bar{P}^k \tilde{U}^\theta) + \frac{1}{\Delta \theta} \partial_\theta (\bar{P}^\theta \tilde{V}^k \sin \theta) \right]_{i,j,k} \\ \quad j = 1, 2, \dots, J-1 \\ [D_2(P)]_{j=0} = -\frac{4}{I a \Delta \theta} \sum_{i=1}^I (\bar{P}^\theta \tilde{V}^k)_{i, \frac{1}{2}, k} \\ [D_2(P)]_{j=J} = -\frac{4}{I a \Delta \theta} \sum_{i=1}^I (\bar{P}^\theta \tilde{V}^k)_{i, J-\frac{1}{2}, k} \end{cases} \quad (33)$$

连续方程形式同(16)式,它满足总质量守恒方程(17)。

### 2. $\mathcal{L}_m(F)(F=U, V, \Phi; m=1, 2, 3)$

$$\begin{cases} [\mathcal{L}_1(U)]_{i+\frac{1}{2}, j+\frac{1}{2}, k} = \frac{1}{2a \sin \theta_{j+\frac{1}{2}} \cdot \Delta \lambda} [2(\tilde{u}^1 \tilde{U}^1)_1 - U(\tilde{u}^1)_k]_{i+\frac{1}{2}, j+\frac{1}{2}, k} \\ [\mathcal{L}_2(U)]_{i+\frac{1}{2}, j+\frac{1}{2}, k} = \frac{1}{2a \sin \theta_{j+\frac{1}{2}} \cdot \Delta \theta} [2(\widetilde{v \sin \theta \tilde{U}^\theta})_\theta \\ \quad - U(\widetilde{v \sin \theta^\theta})_\theta]_{i+\frac{1}{2}, j+\frac{1}{2}, k} \\ [\mathcal{L}_3(U)]_{i+\frac{1}{2}, j+\frac{1}{2}, k} = \frac{1}{2\Delta \sigma} [2\delta_\sigma(\tilde{\sigma}^\theta \tilde{U}^\sigma) - U\delta_\sigma(\tilde{\sigma}^{1,\theta})]_{i+\frac{1}{2}, j+\frac{1}{2}, k} \\ \quad j = 0, 1, \dots, J-1 \end{cases} \quad (34)$$

将(34)式中的  $U$  换成  $V$ , 就得到  $\mathcal{L}_m(V)(m=1, 2, 3)$  的差分格式。

$$\left\{ \begin{aligned} [\mathcal{L}_1(\Phi)]_{i,j,k} &= \frac{1}{2a \sin \theta_j \cdot \Delta \lambda} [2\delta_\lambda(\tilde{u}^\theta \tilde{\Phi}^\lambda) - \Phi \delta_\lambda(\tilde{u}^\theta)]_{i,j,k} \quad j = 1, 2, \dots, J-1 \\ [\mathcal{L}_2(\Phi)]_{i,j,k} &= \frac{1}{2a \sin \theta_j \cdot \Delta \theta} [2\delta_\theta(\tilde{v}^\lambda \sin \theta \tilde{\Phi}^\theta) - \Phi \cdot \delta_\theta(\tilde{v}^\lambda \sin \theta)]_{i,j,k} \\ &\quad j = 1, 2, \dots, J-1 \\ [\mathcal{L}_3(\Phi)]_{i=0} &= \frac{2}{Ia \Delta \theta} \sum_{i=1}^I [(\tilde{v}^\lambda)_{i, \frac{1}{2}, k} \cdot \Phi_{i, 1, k}] \\ [\mathcal{L}_4(\Phi)]_{i=J} &= -\frac{2}{Ia \Delta \theta} \sum_{i=1}^I [(\tilde{v}^\lambda)_{i, J-\frac{1}{2}, k} \cdot \Phi_{i, J-1, k}] \\ [\mathcal{L}_5(\Phi)]_{i,j,k} &= \frac{1}{2\Delta \sigma} [2\delta_\sigma(\dot{\sigma} \tilde{\Phi}^\sigma) - \Phi \delta_\sigma \dot{\sigma}]_{i,j,k} \quad j = 0, 1, \dots, J \end{aligned} \right. \quad (35)$$

(34)、(35)式皆满足方程(22)。

### 3. $f^*V$ 和 $f^*U$

由于  $U$  和  $V$  在同一格点  $(i + \frac{1}{2}, j + \frac{1}{2}, k)$  上取值, 所以在  $B$ -格网中不需要对  $f^*V$  和  $f^*U$  使用平均算子, 此时局地关系式(7)自然保持。

### 4. $\mathcal{P}_\lambda^{(1)}, \mathcal{P}_\theta^{(1)}$ 和 $\frac{c_0 S}{P\sigma} Q^{(1)}$ 以及静力方程

$$\left\{ \begin{aligned} [\mathcal{P}_\lambda^{(1)}]_{i+\frac{1}{2}, j+\frac{1}{2}, k} &= \frac{1}{a \sin \theta_{j+\frac{1}{2}} \cdot \Delta \lambda} [\overline{P^\lambda \tilde{\Phi}_\lambda^\sigma}]_{i+\frac{1}{2}, j+\frac{1}{2}, k} \\ &\quad j = 0, 1, \dots, J-1 \\ [\mathcal{P}_\theta^{(1)}]_{i+\frac{1}{2}, j+\frac{1}{2}, k} &= \frac{1}{a \Delta \theta} [\overline{P^\theta \tilde{\Phi}_\theta^\lambda}]_{i+\frac{1}{2}, j+\frac{1}{2}, k} \\ &\quad j = 0, 1, \dots, J-1 \end{aligned} \right. \quad (36)$$

$\frac{c_0 S}{P\sigma} Q^{(1)}$  形式上同(26)式。

静力方程差分形式同(27)式。

利用性质6、性质1、性质4, (33)、(16)、(27)、(12)诸式以及边界条件可证:

$$\begin{aligned} & - \sum_{k=1}^K \left\{ \sum_{i=1}^I \sum_{j=0}^{J-1} [U \cdot \mathcal{P}_\lambda^{(1)} + V \cdot \mathcal{P}_\theta^{(1)}]_{i+\frac{1}{2}, j+\frac{1}{2}, k} \cdot a^2 \mathbf{e}_{j+\frac{1}{2}} \Delta \theta \Delta \lambda \right. \\ & \quad \left. - \sum_{i=1}^I \sum_{j=0}^{J-1} \left[ \Phi \cdot \frac{c_0 S}{P\sigma} Q^{(1)} \right]_{i,j,k} \cdot a^2 \mathbf{e}_j \Delta \theta \Delta \lambda \right\} \cdot \Delta \sigma \\ & = - \frac{\partial}{\partial t} \sum_{i=1}^I \sum_{j=0}^{J-1} \left[ \frac{R \tilde{T}_t}{\tilde{P}_t} \cdot \frac{1}{2} (p'_\sigma)^2 \right]_{i,j} \cdot a^2 \mathbf{e}_j \Delta \theta \Delta \lambda \end{aligned} \quad (37)$$

5.  $\mathcal{D}_\lambda^{(2)}, \mathcal{D}_\theta^{(2)}$  和  $\frac{c_0 S}{P_\sigma} Q_\lambda^{(2)}, \frac{c_0 S}{P_\sigma} Q_\theta^{(2)}$

$$[\mathcal{D}_\lambda^{(2)}]_{i+\frac{1}{2}, j+\frac{1}{2}, k} = \frac{2c_0}{a \sin \theta_{j+\frac{1}{2}} \cdot \Delta \lambda} [\widetilde{F}_U^{\lambda, \theta}]_{i+\frac{1}{2}, j+\frac{1}{2}, k} \quad i = 0, 1, 2, \dots, J-1 \quad (38)_1$$

其中

$$[F_U]_{i, j, k} = \begin{cases} \left[ \Phi \cdot \left( \frac{S}{P} \right)^{\lambda} P_\lambda \right]_{i, j, k} & j = 1, 2, \dots, J-1 \\ 0 & j = 0, J \end{cases} \quad (38)_2$$

$$[\mathcal{D}_\theta^{(2)}]_{i+\frac{1}{2}, j+\frac{1}{2}, k} = \frac{2c_0}{a \Delta \theta} [\widetilde{F}_V^{\lambda, \theta}]_{i+\frac{1}{2}, j+\frac{1}{2}, k} \quad j = 0, 1, 2, \dots, J-1 \quad (38)_3$$

其中

$$[F_V]_{i, j, k} = \begin{cases} \left[ \Phi \cdot \left( \frac{S}{P} \right)^{\theta} P_\theta \right]_{i, j, k} & j = 1, 2, \dots, J-1 \\ \left[ \Phi \cdot \left( \frac{S}{P} \right) \right]_{N, k} \cdot [P_\theta]_{i, \frac{1}{2}} & j = 0 \\ \left[ \Phi \cdot \left( \frac{S}{P} \right) \right]_{S, k} \cdot [P_\theta]_{i, J-\frac{1}{2}} & j = J \end{cases} \quad (38)_4$$

这里  $N$  和  $S$  分别表示北极点和南极点, 用以代替下标  $(i, j)$ .

$$\left[ \frac{c_0 S}{P_\sigma} Q_\lambda^{(2)} \right]_{i, j, k} = \begin{cases} \frac{2c_0}{a \sin \theta_j \cdot \Delta \lambda} \left[ \widetilde{U}^{\lambda, \theta} \left( \frac{S}{P} \right)^{\lambda} P_\lambda \right]_{i, j, k} & j = 1, 2, \dots, J-1 \\ 0 & j = 0, J \end{cases} \quad (39)_1$$

$$\left[ \frac{c_0 S}{P_\sigma} Q_\theta^{(2)} \right]_{i, j, k} = \begin{cases} \frac{2c_0}{a \sin \theta_j \cdot \Delta \theta} \left[ \widetilde{V}^{\lambda, \theta} \sin^{\lambda, \theta} \cdot \left( \frac{S}{P} \right)^{\theta} P_\theta \right]_{i, j, k} & j = 1, 2, \dots, J-1 \\ \frac{4c_0}{I a \Delta \theta} \left( \frac{S}{P} \right)_{N, k} \cdot \sum_{i=1}^I [\widetilde{V}^{\lambda} P_\theta]_{i, \frac{1}{2}, k} & j = 0 \\ \frac{4c_0}{I a \Delta \theta_S} \left( \frac{S}{P} \right)_{S, k} \cdot \sum_{i=1}^I [\widetilde{V}^{\lambda} P_\theta]_{i, J-\frac{1}{2}, k} & j = J \end{cases} \quad (39)_2$$

利用性质 7 可以证明:

$$\begin{aligned} & - \sum_{i=1}^I \sum_{j=0}^{J-1} [U \cdot \mathcal{D}_\lambda^{(2)}]_{i+\frac{1}{2}, j+\frac{1}{2}, k} \cdot a^2 \varepsilon_{j+\frac{1}{2}} \Delta \theta \Delta \lambda \\ & + \sum_{i=1}^I \sum_{j=0}^J \left[ \Phi \cdot \frac{c_0 S}{P_\sigma} Q_\lambda^{(2)} \right]_{i, j, k} \cdot a^2 \varepsilon_j \Delta \theta \Delta \lambda = 0 \end{aligned} \quad (40)_1$$

和

$$- \sum_{i=1}^I \sum_{j=0}^{J-1} [V \cdot \mathcal{D}_\theta^{(2)}]_{i+\frac{1}{2}, j+\frac{1}{2}, k} \cdot a^2 \varepsilon_{j+\frac{1}{2}} \Delta \theta \Delta \lambda$$

$$+ \sum_{i=1}^I \sum_{j=0}^J \left[ \Phi \cdot \frac{c_0 S}{P \sigma} Q_{\theta}^{(2)} \right]_{i,j,k} \cdot a^2 \varepsilon_j \Delta \theta \Delta \lambda = 0 \quad (40)_2$$

这套差分格式的总有效能量是守恒的, 即

$$\begin{aligned} & \frac{\partial}{\partial t} \left\{ \sum_{k=1}^K \left( \sum_{i=1}^I \sum_{j=0}^{J-1} \frac{1}{2} [U^2 + V^2]_{i+\frac{1}{2}, j+\frac{1}{2}, k} \cdot a^2 \varepsilon_j \Delta \theta \Delta \lambda + \right. \right. \\ & \quad \left. \left. + \sum_{i=1}^I \sum_{j=0}^J \frac{1}{2} [\Phi^2]_{i,j,k} \cdot a^2 \varepsilon_j \Delta \theta \Delta \lambda \right) \cdot \Delta \sigma + \right. \\ & \quad \left. + \sum_{i=1}^I \sum_{j=0}^J \left[ \frac{R \tilde{T}_s}{\bar{P}_s} \cdot \frac{1}{2} (p'_{ex})^2 \right]_{i,j} \cdot a^2 \varepsilon_j \Delta \theta \Delta \lambda \right\} = 0 \quad (41) \end{aligned}$$

### 参 考 文 献

- [1] 曾庆存, 1979, 数值天气预报的数学物理基础, 第一卷, 科学出版社.
- [2] 曾庆存, 1965, 论原始方程差分格式的设计, 中国科学院地球物理研究所技术报告.
- [3] Zeng Qingcun, Ji Zhongzhen and Yuan Chongguang, 1982, Designs of difference schemes for the primitive equation, SCIENTIA SINICA (Series B), Vol. XXV, p. 183—199.
- [4] 曾庆存, 张学洪, 1981, 完全保持能量守恒的可压缩流体时-空差分格式和协调的分解算法, 中国科学, 11期, p. 1355—1366.
- [5] Arakawa A. and V. R. Lamb, 1977, Computational design of the basic dynamical processes of the UCLA general circulation model, Methods in Computational Physics, Vol. 17, p. 173—265.
- [6] 曾庆存, 袁重光, 张学洪, 包宁, 1985, 一个大气环流模式差分格式的检验, 气象学报, Vol. 43, p. 441—449.
- [7] Zeng Qingcun, Computational Chaos and instability, and the design of perfectly energy-conservative computational scheme, seminar at GFDL, January 14, 1982.
- [8] Zeng Qingcun, Some numerical ocean-atmosphere coupling models, proceedings of the first international symposium on the integrated global ocean monitoring, Tallinn USSR, October 2—10, 1983.

## AVAILABLE ENERGY CONSERVING SCHEMES FOR SPHERICAL BAROCLINIC PRIMITIVE EQUATIONS

Zeng Qingcun Zhang Xuehong

(Institute of Atmospheric Physics, Academia Sinica)

### Abstract

Two schemes conserving the available energy (the sum of total kinetic energy, total available relative potential energy and total available surface potential energy) under the standard stratification approximation have been designed for spherical baroclinic primitive equations. One scheme is written for the spherical C-grids, and the other for B-grids. Some useful characteristics of differencing and averaging operators defined in these staggered grids are also investigated.
